# Supplementary material for: Synthesis of a chiral amino acid with bicyclo[1.1.1]pentane moiety and its incorporation into linear and cyclic antimicrobial peptides
Source: Royal Society of Chemistry journal article supplement (doi:10.1039/b702134h), 2007-01-01
Supplement: b702134h.pdf [file b702134h.pdf]

# Synthesis of a chiral amino acid with bicyclo[1.1.1]pentane moiety and its incorporation into linear and cyclic antimicrobial peptides

Stephan Pritz,<sup>\*a</sup> Michael Pätzelt,<sup>\*b</sup> Günter Szeimies,<sup>b</sup> Margitta Dathe<sup>a</sup> and Michael Bienert<sup>a</sup>

<sup>a</sup>Leibniz-Institute of Molecular Pharmacology, Robert-Rössle-Strasse 10, 13125 Berlin, Germany.

Email: pritz@fmp-berlin.de

<sup>b</sup>Humboldt-Universität zu Berlin, Institut für Chemie, Brook-Taylor-Str. 2, 12489 Berlin, Germany.

E-mail: michael.paetzel@rz.hu-berlin.de

---

## Peptide Synthesis and Purification

Synthesis of the peptides was performed manually by the solid-phase method using standard Fmoc chemistry. TentaGel SRAM resin (Rapp, 0.22 mmol g<sup>-1</sup>) or 2-Chlorotrityl resin (Novabiochem, 1.23 mmol g<sup>-1</sup>) were used for the linear peptides or for the linear precursors of the cyclic peptides, respectively. Couplings were carried out with 3 or 4 equiv of Fmoc-amino acid derivatives, 3-4 equiv of HBTU and 6-8 equiv of DIEA at ambient temperature. After final cleavage with 10% phenol in TFA crude linear peptides were purified by preparative HPLC on a PolyEncap A300 column, 10 µm, 250 × 20 mm i.d. (Bischoff Analysentechnik GmbH, Leonberg), using a LDC Analytical System: mobile phase A, 0.1% TFA/water: mobile phase B, 80% acetonitrile/water-0.1% TFA (v/v/v); linear gradient 20-60% B in 70 min, at a flow rate of 10 ml/min. Cyclisation of crude peptides was achieved by activation with 1.1 equiv. HAPyU in DMF (1.0 mM). Purification was done as described above.

HPLC analyses were carried out on a PolyEncap A300 column using an acetonitrile/water/TFA solvent system (eluent A: 0.1% TFA, eluent B: 80% acetonitrile/0.1% TFA, linear gradient 5-95% B in 40 min). Peptides were characterised by matrix-assisted laser desorption/ionisation mass spectrometry which gave the expected [M+H]<sup>+</sup> mass peaks.

| Name       | Sequence                  | mw calcd.<br>[M+H] <sup>+</sup> | mw found<br>[M+H] <sup>+</sup> | HPLC<br>purity    |
|------------|---------------------------|---------------------------------|--------------------------------|-------------------|
| <b>10a</b> | Ac-RRWWRF-NH <sub>2</sub> | 1047.58                         | 1047.53                        | >99% <sup>a</sup> |
| <b>11a</b> | Ac-RRW1RF-NH <sub>2</sub> | 1040.63                         | 1040.66                        | >99% <sup>a</sup> |
| <b>12a</b> | Ac-RR11RF-NH <sub>2</sub> | 1033.68                         | 1033.60                        | 96% <sup>a</sup>  |
|            | H-RRWWRF-OH               | 1006.54                         | 1006.45                        | 97% <sup>a</sup>  |
|            | H-RRW1RF-OH               | 999.59                          | 999.60                         | 70%               |
|            | H-RR11RF-OH               | 992.64                          | 992.65                         | 53%               |
| <b>10b</b> | cyclo(RRWWRF)             | 988.54                          | 988.47                         | 97% <sup>a</sup>  |
| <b>11b</b> | cyclo(RRW1RF)             | 981.59                          | 981.39                         | 85% <sup>a</sup>  |
| <b>12b</b> | cyclo(RR11RF)             | 974.64                          | 974.46                         | 90% <sup>a</sup>  |

<sup>a</sup> Purified product.
